# Supplementary material for: When Giants Turn Up: Sighting Trends, Environmental Influences and Habitat Use of the Manta Ray Manta alfredi at a Coral Reef
Source: PubMed Central journal article supplement (PMC3463571; doi:10.1371/journal.pone.0046170), 2012-10-03
Supplement: pone.0046170.s001.pdf [file pone.0046170.s001.pdf]

|                      | Day of year | Time of day | Wind speed | Wind direction | Sea temperature | Time to high tide | Tidal range | Moon illumination | Chlorophyll <i>a</i> |
|----------------------|-------------|-------------|------------|----------------|-----------------|-------------------|-------------|-------------------|----------------------|
| Day of year          | 1           | -0.007      | -0.035     | 0.023          | -0.507          | -0.021            | 0.051       | 0.083             | 0.015                |
| Time of day          | -0.007      | 1           | -0.041     | -0.06          | 0.107           | -0.018            | 0.024       | 0.02              | -0.045               |
| Wind speed           | -0.035      | -0.041      | 1          | 0.01           | 0.088           | 0.011             | 0.038       | 0.06              | -0.096               |
| Wind direction       | 0.023       | -0.06       | 0.01       | 1              | -0.148          | -0.067            | -0.041      | 0.05              | 0.164                |
| Sea temperature      | -0.507      | 0.107       | 0.088      | -0.148         | 1               | 0.021             | 0.001       | -0.058            | -0.312               |
| Time to high tide    | -0.021      | -0.018      | 0.011      | -0.067         | 0.021           | 1                 | -0.064      | -0.012            | 0.033                |
| Tidal range          | 0.051       | 0.024       | 0.038      | -0.041         | 0.001           | -0.064            | 1           | -0.069            | -0.094               |
| Moon illumination    | 0.083       | 0.02        | 0.06       | 0.05           | -0.058          | -0.012            | -0.069      | 1                 | -0.036               |
| Chlorophyll <i>a</i> | 0.015       | -0.045      | -0.096     | 0.164          | -0.312          | 0.033             | -0.094      | -0.036            | 1                    |
